# Supplementary material
Source: publisher figshare collection journal article supplement (https://acs.figshare.com/ndownloader/files/20306547)
Supplement: Supplementary file 1 [file 20306547]

Compound,SMILE,Maximum cytokine response Murine,Minimal Effective Concentration Murine,Maximum cytokine response �h-IL-6 (OD),next dilution after cytokine drops,
UM1013,COc1cccc(c1OC)C(=O)OCC1OC(OC2OC(COC(=O)c3cccc(OC)c3OC)C(O)C(O)C2O)C(O)C(O)C1O,3,37,NA,,
UM1014,COc1cc(cc(OC)c1)C(=O)OCC1OC(OC2OC(COC(=O)c3cc(OC)cc(OC)c3)C(O)C(O)C2O)C(O)C(O)C1O,3.3,37,NA,,
UM1015,CCOc1cc(cc(OCC)c1)C(=O)OCC1OC(OC2OC(COC(=O)c3cc(OCC)cc(OCC)c3)C(O)C(O)C2O)C(O)C(O)C1O,3.5,12.3,3.6,111,
UM1016,Cc1cc(cc(C)c1)C(=O)OCC1OC(OC2OC(COC(=O)c3cc(C)cc(C)c3)C(O)C(O)C2O)C(O)C(O)C1O,3,4.1,1.5,1000,
UM1017,CCc1cc(cc(CC)c1)C(=O)OCC1OC(OC2OC(COC(=O)c3cc(CC)cc(CC)c3)C(O)C(O)C2O)C(O)C(O)C1O,2.5,4.1,NA,,
UM1018,COc1cccc(/C=C/C(=O)OCC2OC(OC3OC(COC(=O)/C=C/c4cccc(OC)c4OC)C(O)C(O)C3O)C(O)C(O)C2O)c1OC,3.5,37,1.3,333,
UM1019,COc1ccc(cc1OC)/C=C/C(=O)OCC1OC(OC2OC(COC(=O)/C=C/c3ccc(OC)c(OC)c3)C(O)C(O)C2O)C(O)C(O)C1O,2.3,111,2,333,
UM1020,COc1cc(cc(OC)c1OC)/C=C/C(=O)OCC1OC(OC2OC(COC(=O)/C=C/c3cc(OC)c(OC)c(OC)c3)C(O)C(O)C2O)C(O)C(O)C1O,3.2,33.3,1.5,333,
UM1021,Oc1ccc(cc1O)/C=C/C(=O)OCC1OC(OC2OC(COC(=O)/C=C/c3ccc(O)c(O)c3)C(O)C(O)C2O)C(O)C(O)C1O,3,333,2,333,
UM1022,Cc1cc(OC)cc(OC)c1C(=O)OCC1OC(OC2OC(COC(=O)c3c(C)cc(OC)cc3OC)C(O)C(O)C2O)C(O)C(O)C1O,3.3,37,3,333,
UM1023,CC(C)c1cc(c(O)c(c1)C(C)C)C(=O)OCC1OC(OC2OC(COC(=O)c3cc(cc(C(C)C)c3O)C(C)C)C(O)C(O)C2O)C(O)C(O)C1O,2.5,0.45,NA,,
UM1024,CC(C)(C)c1cc(c(O)c(c1)C(C)(C)C)C(=O)OCC1OC(OC2OC(COC(=O)c3cc(cc(c3O)C(C)(C)C)C(C)(C)C)C(O)C(O)C2O)C(O)C(O)C1O,3,0.45,3.5,1,
UM1046,CC(C)(C)c1cc(c(O)c(c1O)C(=O)OCC1OC(OC2OC(COC(=O)c3c(O)c(cc(c3O)C(C)(C)C)C(C)(C)C)C(O)C(O)C2O)C(O)C(O)C1O)C(C)(C)C,0.8,0.4,3,20,
UM1047,CC(C)(C)c1cc(cc(c1)C(C)(C)C)C(=O)OCC1OC(OC2OC(COC(=O)c3cc(cc(c3)C(C)(C)C)C(C)(C)C)C(O)C(O)C2O)C(O)C(O)C1O,0.9,1.2,1,11,
UM1048,CC(C)(C)c1cc(c(O)cc1)C(=O)OCC1OC(OC2OC(COC(=O)c3cc(ccc3O)C(C)(C)C)C(O)C(O)C2O)C(O)C(O)C1O,NA,,NA,,
UM1068,CC(C)c1cc(O)cc(O)c1C(=O)OCC1OC(OC2OC(COC(=O)c3c(cc(O)cc3O)C(C)C)C(O)C(O)C2O)C(O)C(O)C1O,3,100,2.6,33.3,
UM1087,CC(C)(C)c1cc(cc(c1O)C(C)(C)C)C(=O)OCC1OC(OC2OC(COC(=O)c3cc(c(O)c(c3)C(C)(C)C)C(C)(C)C)C(O)C(O)C2O)C(O)C(O)C1O,3,0.13,3,33.3,
,,,,,,
,,,,,,
,,,,,,
,,,,,,
